# Supplementary material for: Spatiotemporal Dynamics of Hantavirus Cardiopulmonary Syndrome Transmission Risk in Brazil
Source: MDPI journal article supplement (doi:10.3390/v11111008), 2019-10-31
Supplement: s1 [file s1]

Supplementary Materials

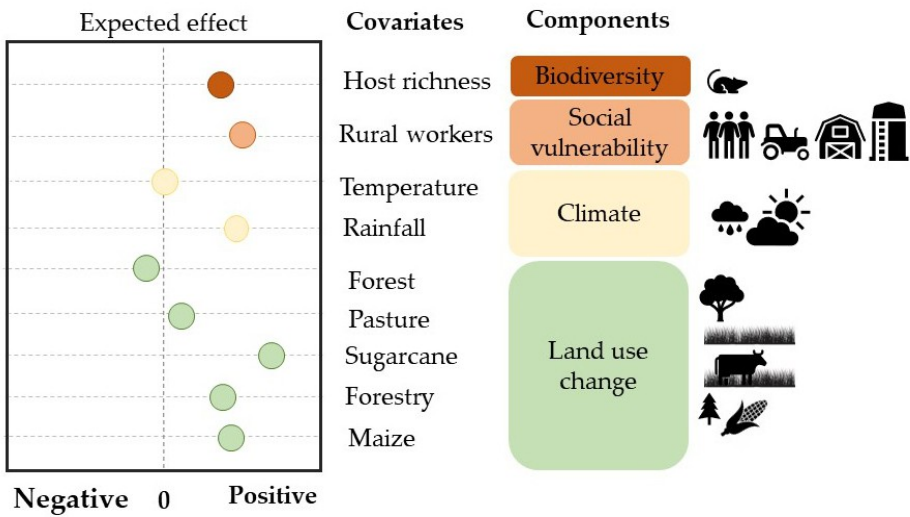

**Figure S1. Coefficient plot based on our working hypothesis for hantavirus disease risk in Brazil.** Negative coefficients represent a decrease in risk, positive values represent an increase in risk. Expected effect sizes were inferred from previous findings [6,10,11,24].

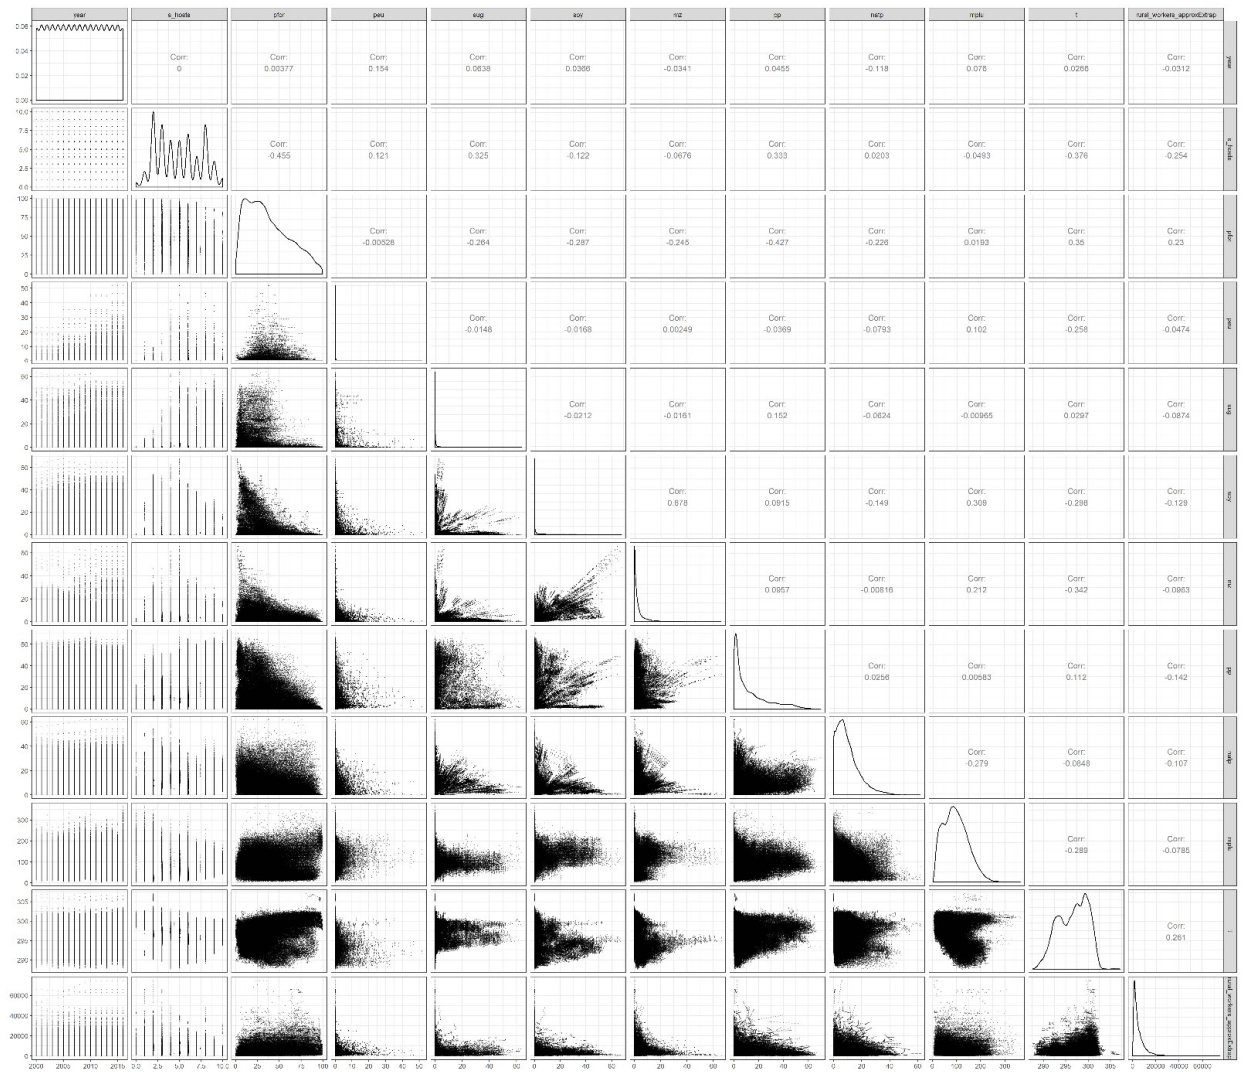

**Figure S2. Pair plots and correlation between predictors used to model hantavirus disease risk in Brazil. Values correspond to Pearson's correlation coefficients.**

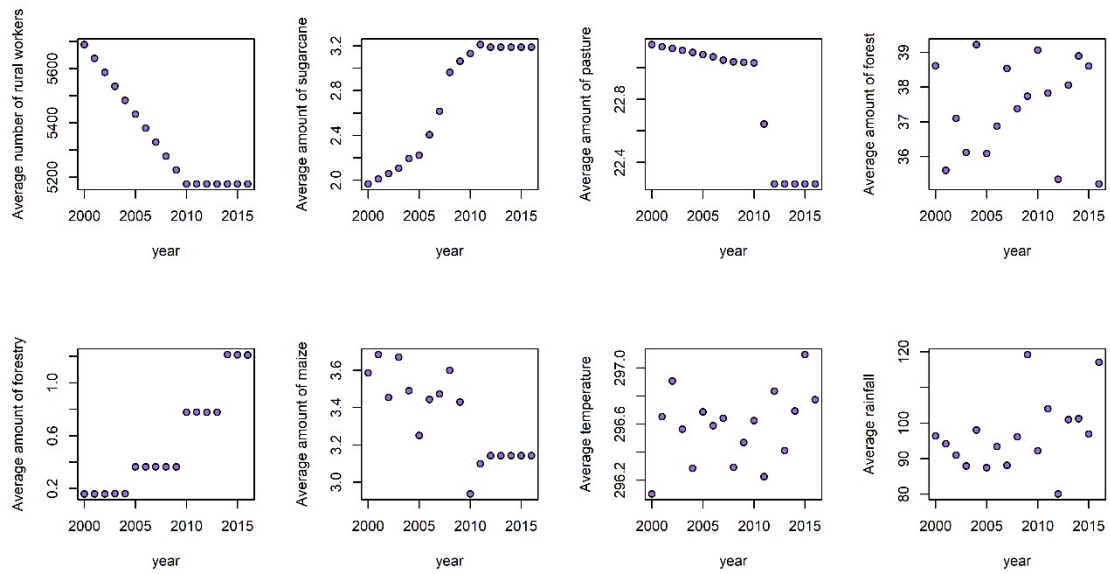

**Figure S3. Fixed covariate values averaged over municipalities.** We used the covariates in the modeling procedure of hantavirus disease numbers and the probability of cases in Brazil from 2000-2016. Host richness was considered constant through time.

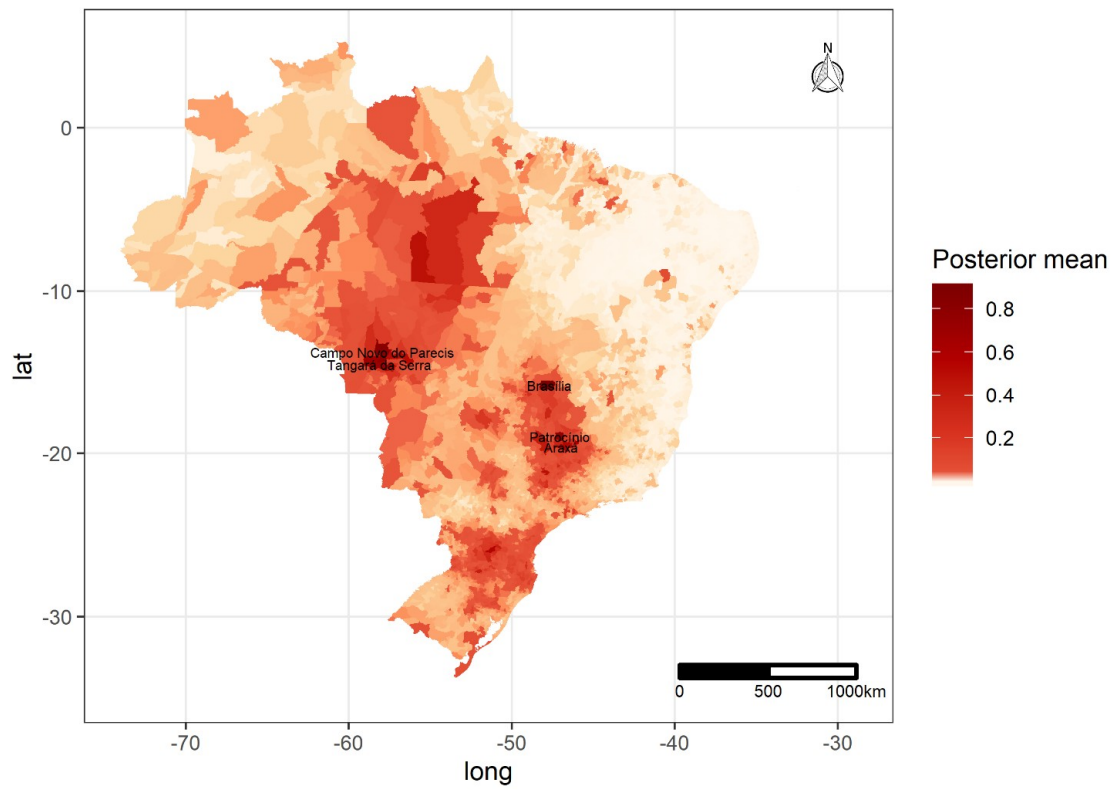

**Figure S4. Hantavirus disease distribution in Brazil.** Current expected values for the probability of hantavirus disease in humans, predicted by a spatio-temporal model containing forest, climate, and population at risk. Top five municipalities in terms of risk per year are highlighted. See the risk map with the uncertainty layer in Figure 3.

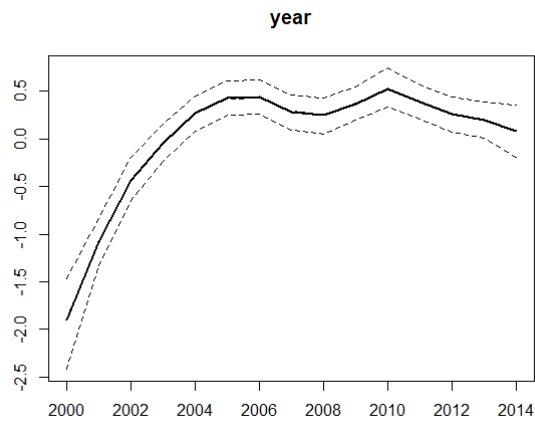

(a)

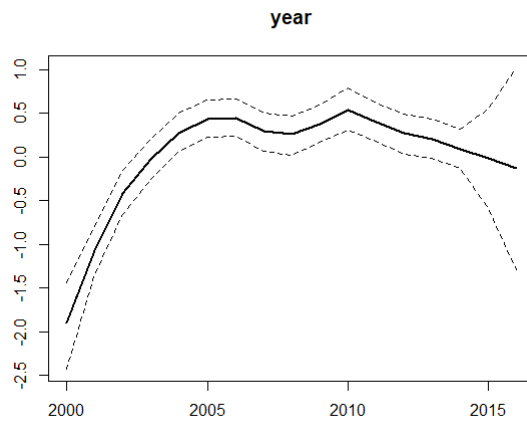

(b)

**Figure S5. (a) Time trend for a binomial model estimating the probability of hantavirus disease cases in humans as a function of biodiversity, climate, social vulnerability and landscape change between 2000 to 2014 in Brazil. The y axis represents random effect values and the predictor is each year. (b) Predictions for 2015 and 2016 using new data for covariates and NA data for response variable. Dashed lines correspond to 95% credible intervals or the posterior mean.**

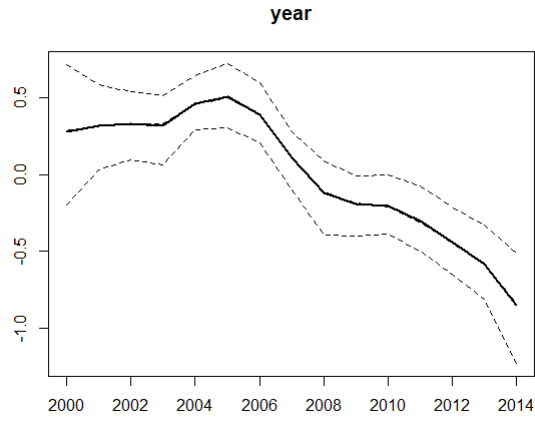

(a)

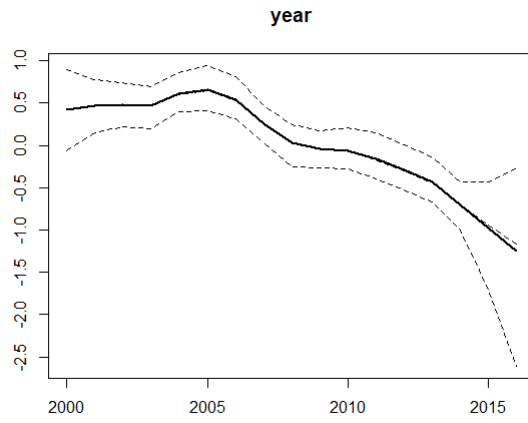

(b)

**Figure S6. (a) Time trend for a zero truncated Poisson model estimating the number of cases in humans as a function of biodiversity, climate, social vulnerability and landscape change between 2000 to 2014 in Brazil. The y axis represents random effect values and the predictor is each year. (b) Predictions for 2015 and 2016 using new data for covariates and NA data for response variable. Dashed lines correspond to 95% credible intervals or the posterior mean.**

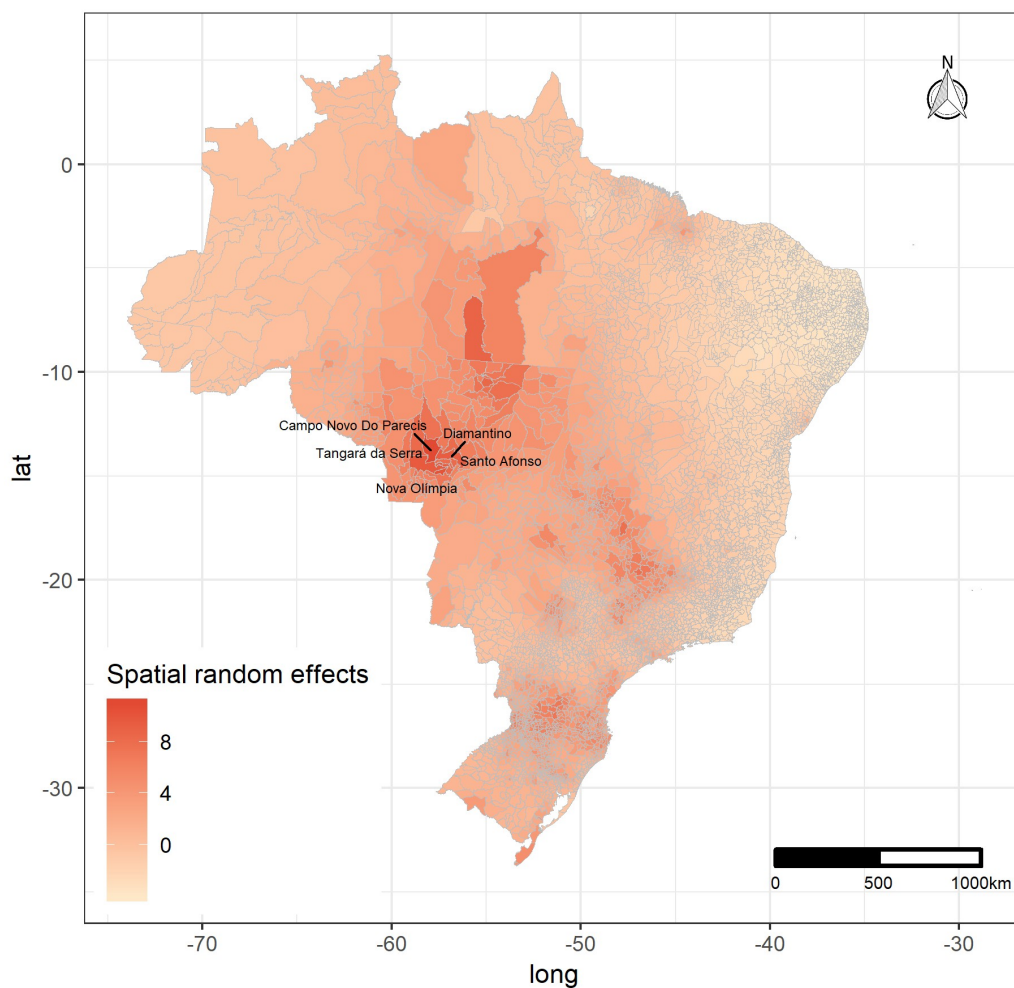

**Figure S7. Municipalities showing positive effects of the spatial random field on hantavirus disease risk.** The municipalities in labels are the ones with top five higher spatial random effect values.

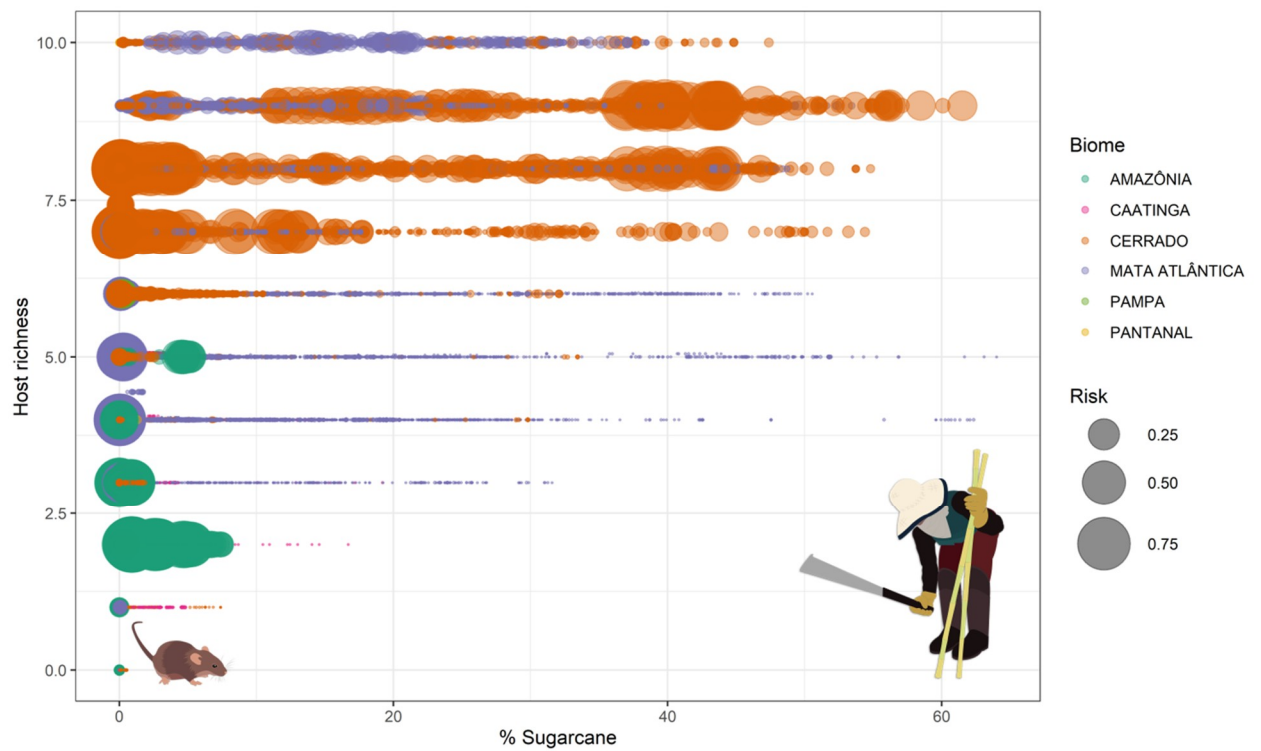

**Figure S8. The number of species of hosts and the sugarcane amount in the municipality.** The bubble size is proportional to the average predicted HCPS risk. Points are colored according to biome.



**Table S1. Data sources used in the spatial-temporal modelling procedure.**

| Variable                            | Time span              | Spatial resolution<br>in decimal degrees<br>(Metric)/<br>Cartographic scale<br>(Metric) | Source              | Source URL                                                                                                                                                                                                                                                                                                                               |
|-------------------------------------|------------------------|-----------------------------------------------------------------------------------------|---------------------|------------------------------------------------------------------------------------------------------------------------------------------------------------------------------------------------------------------------------------------------------------------------------------------------------------------------------------------|
| Surface Temperature                 | 2000-2016              | 0.5 (50 km)                                                                             | NOAA NCEP           | <a href="http://iridl.ldeo.columbia.edu/SOURCES/.NOAA/.NCEP/.CPC/.GHCN_CAMS/.gridded/.deg0p5/.temp/">http://iridl.ldeo.columbia.edu/SOURCES/.NOAA/.NCEP/.CPC/.GHCN_CAMS/.gridded/.deg0p5/.temp/</a>                                                                                                                                      |
| Rainfall                            | 2000-2016              | 0.05 (5 km)                                                                             | CHIRPS              | <a href="http://chg.geog.ucsb.edu/data/chirps/">http://chg.geog.ucsb.edu/data/chirps/</a> , <a href="https://pubs.usgs.gov/ds/832/">https://pubs.usgs.gov/ds/832/</a>                                                                                                                                                                    |
| Agricultural land use               | 2000-2014              | 0.01 (1 km)                                                                             | Dias et al 2016 GCB | <a href="https://www.biosfera.dea.ufv.br/pt-BR/banco/uso-do-solo-agricola-no-brasil-1940-2012---dias-et-al-2016">biosfera.dea.ufv.br/pt-BR/banco/uso-do-solo-agricola-no-brasil-1940-2012---dias-et-al-2016</a>                                                                                                                          |
| Native habitat pasture              | 2000-2014              | 0.01 (1 km)                                                                             | Dias et al 2016 GCB | <a href="https://www.biosfera.dea.ufv.br/pt-BR/banco/uso-do-solo-agricola-no-brasil-1940-2012---dias-et-al-2016">biosfera.dea.ufv.br/pt-BR/banco/uso-do-solo-agricola-no-brasil-1940-2012---dias-et-al-2016</a>                                                                                                                          |
| Native habitat forests and forestry | 2000-2016              | 0.0003 (30 m)                                                                           | Mapbiomas2          | <a href="http://mapbiomas.org/pages/database/mapbiomas_collection">http://mapbiomas.org/pages/database/mapbiomas_collection</a>                                                                                                                                                                                                          |
| Political divisions                 | 2015                   | 1:500000 (2.5 km)                                                                       | IBGE                | <a href="ftp://geofp.ibge.gov.br/organizacao_do_territorio/malhas_territoriais/malhas_municipais/">ftp://geofp.ibge.gov.br/organizacao_do_territorio/malhas_territoriais/malhas_municipais/</a>                                                                                                                                          |
| Hantavirus cases in humans          | 1993-2017              | 1:500000 (5 km)                                                                         | M Health            | <a href="https://datasus.gov.br">datasus.gov.br</a>                                                                                                                                                                                                                                                                                      |
| Census                              | 1991, 2000, 2006, 2010 | 1:500000 (5 km)                                                                         | IBGE                | <a href="https://downloads.ibge.gov.br/downloads_estatisticas.htm">https://downloads.ibge.gov.br/downloads_estatisticas.htm</a> , <a href="http://ftp.ibge.gov.br/Estimativas_de_Populacao/">ATLAS ONU, http://ftp.ibge.gov.br/Estimativas_de_Populacao/</a> , <a href="ftp://ftp.ibge.gov.br/Censos/">ftp://ftp.ibge.gov.br/Censos/</a> |
| Biome limits                        | 2004                   | 1:250000 (2.5 km)                                                                       | MMA                 | <a href="http://mapas.mma.gov.br/i3geo/datadownload.htm">http://mapas.mma.gov.br/i3geo/datadownload.htm</a> , <a href="https://drive.google.com/file/d/0Byp5eRWoQ-Pka0hITTVDVWV/ISFU/view?ts=5984ccbf">https://drive.google.com/file/d/0Byp5eRWoQ-Pka0hITTVDVWV/ISFU/view?ts=5984ccbf</a>                                                |

**Table S2. Spatial auto-correlation tests for the distribution of hantavirus disease cases in humans in Brazil.** Using 5% as alpha error level, we observe some clustering in 2006 and 2013. sd= standard deviation.  
In 1994 and 1997 no cases were notified.

| <b>Year</b> | <b>Observed</b> | <b>Expected</b> | <b>sd</b> | <b>P value</b> |
|-------------|-----------------|-----------------|-----------|----------------|
| 1993        | -0.0001         | -0.0002         | 0.0001    | 0.4953         |
| 1995        | -0.0002         | -0.0002         | 0.0001    | 0.4571         |
| 1996        | -0.0003         | -0.0002         | 0.0046    | 0.9864         |
| 1998        | 0.0008          | -0.0002         | 0.0051    | 0.8494         |
| 1999        | -0.0008         | -0.0002         | 0.005     | 0.8988         |
| 2000        | 0.001           | -0.0002         | 0.0046    | 0.806          |
| 2001        | 0.0041          | -0.0002         | 0.0053    | 0.4121         |
| 2002        | 0.0034          | -0.0002         | 0.0053    | 0.4963         |
| 2003        | 0.0035          | -0.0002         | 0.0055    | 0.5015         |
| 2004        | 0.0018          | -0.0002         | 0.0042    | 0.6334         |
| 2005        | 0.0028          | -0.0002         | 0.0052    | 0.5711         |
| 2006        | 0.0119          | -0.0002         | 0.0052    | 0.0207         |
| 2007        | 0.0006          | -0.0002         | 0.0054    | 0.8872         |
| 2008        | 0.0052          | -0.0002         | 0.0049    | 0.2795         |
| 2009        | 0.0022          | -0.0002         | 0.0052    | 0.6422         |
| 2010        | 0.0024          | -0.0002         | 0.0047    | 0.5884         |
| 2011        | 0.0052          | -0.0002         | 0.0054    | 0.3223         |
| 2012        | 0.0073          | -0.0002         | 0.0055    | 0.1729         |
| 2013        | 0.0109          | -0.0002         | 0.0052    | 0.0332         |
| 2014        | 0.0044          | -0.0002         | 0.0055    | 0.4026         |
| 2015        | 0.0032          | -0.0002         | 0.0054    | 0.5332         |
| 2016        | 0.0019          | -0.0002         | 0.0051    | 0.6759         |

**Table S3. Rodent host selected predictors in models based on climate.** Factorial analysis showing which factors contribute more for the variation in multivariate axes over the extent. This analysis helps select the most meaningful variables for explaining the environmental gradient that possibly correlates with species distribution. Factorial analysis uses correlation among input variables to sort related variables into “Factors”. From this analysis you can pick the ones that contribute more for each factor as a suitable variable describing the climatic patterns from all variables that are available to use. Selected variables in boldface.

| <b>Bioclimatic variable</b>                                              | <b>MR1</b>  | <b>MR2</b>  | <b>MR3</b> | <b>MR6</b>  | <b>MR4</b>  | <b>MR5</b>  |
|--------------------------------------------------------------------------|-------------|-------------|------------|-------------|-------------|-------------|
| BIO1 = Annual Mean Temperature                                           | 0.94        | -0.06       | 0.23       | -0.15       | 0.18        | -0.06       |
| <b>BIO2 = Mean Diurnal Range (Mean of monthly (max temp - min temp))</b> | -0.13       | -0.40       | -0.05      | <b>0.89</b> | 0.00        | 0.13        |
| <b>BIO3 = Isothermality (BIO2/BIO7) (* 100)</b>                          | 0.56        | 0.14        | 0.30       | -0.26       | <b>0.66</b> | -0.04       |
| BIO4 = Temperature Seasonality (standard deviation *100)                 | -0.64       | 0.12        | -0.43      | 0.16        | -0.51       | 0.07        |
| BIO5 = Max Temperature of Warmest Month                                  | 0.88        | -0.17       | 0.17       | 0.32        | -0.12       | -0.20       |
| BIO6 = Min Temperature of Coldest Month                                  | 0.79        | 0.12        | 0.24       | -0.44       | 0.28        | -0.17       |
| BIO7 = Temperature Annual Range (BIO5-BIO6)                              | -0.42       | -0.25       | -0.19      | 0.74        | -0.42       | 0.09        |
| BIO8 = Mean Temperature of Wettest Quarter                               | 0.87        | -0.13       | 0.13       | -0.11       | 0.11        | 0.15        |
| BIO9 = Mean Temperature of Driest Quarter                                | 0.83        | 0.03        | 0.28       | -0.21       | 0.23        | -0.26       |
| <b>BIO10 = Mean Temperature of Warmest Quarter</b>                       | <b>0.97</b> | 0.01        | 0.11       | -0.15       | -0.06       | -0.12       |
| BIO11 = Mean Temperature of Coldest Quarter                              | 0.88        | -0.07       | 0.31       | -0.16       | 0.30        | -0.10       |
| BIO12 = Annual Precipitation                                             | 0.22        | 0.55        | 0.77       | -0.07       | 0.09        | 0.14        |
| BIO13 = Precipitation of Wettest Month                                   | 0.29        | 0.04        | 0.93       | -0.07       | 0.11        | 0.02        |
| BIO14 = Precipitation of Driest Month                                    | -0.06       | 0.95        | 0.11       | -0.17       | 0.10        | 0.09        |
| BIO15 = Precipitation Seasonality (Coefficient of Variation)             | 0.19        | -0.87       | -0.01      | 0.13        | 0.15        | -0.11       |
| BIO16 = Precipitation of Wettest Quarter                                 | 0.30        | 0.07        | 0.94       | -0.05       | 0.10        | 0.05        |
| <b>BIO17 = Precipitation of Driest Quarter</b>                           | -0.06       | <b>0.97</b> | 0.13       | -0.17       | 0.09        | 0.10        |
| <b>BIO18 = Precipitation of Warmest Quarter</b>                          | -0.26       | 0.36        | 0.15       | 0.19        | -0.04       | <b>0.79</b> |
| BIO19 = Precipitation of Coldest Quarter                                 | 0.22        | 0.48        | 0.45       | -0.37       | 0.12        | -0.27       |

**Table S4. Performance of suitable niche models for explaining host occurrence in Brazil.** After model selection (TSS>0.5) we used expert opinion to validate the 10-percentile threshold for observed presence data to infer host presence.

| Species                        | Mean AUC | Mean TSS | SD<br>AUC | SD TSS | Hantavirus<br>genotypes |
|--------------------------------|----------|----------|-----------|--------|-------------------------|
| <i>Akodon cursor</i>           | 0.82     | 0.62     | 0.11      | 0.18   | JUQV JUQV like          |
| <i>Akodon montensis</i>        | 0.92     | 0.79     | 0.07      | 0.14   | ARQV JABV               |
| <i>Calomys tener</i>           | 0.88     | 0.77     | 0.08      | 0.14   | ARQV                    |
| <i>Holochilus sciureus</i>     | 0.55     | 0.34     | 0.21      | 0.26   | RIOMM                   |
| <i>Necomys lasiurus</i>        | 0.7      | 0.41     | 0.07      | 0.11   | ARQV                    |
| <i>Oligoryzomys eliurus</i>    | 0.55     | 0.35     | 0.23      | 0.27   | CASV                    |
| <i>Oligoryzomys fornesi</i>    | 0.82     | 0.64     | 0.13      | 0.24   | ANJV                    |
| <i>Oligoryzomys microtis</i>   | 0.52     | 0.32     | 0.26      | 0.29   | RIOMV                   |
| <i>Oligoryzomys nigripes</i>   | 0.86     | 0.67     | 0.07      | 0.12   | JUQV, ARQV              |
| <i>Oxymycterus dasytrichus</i> | 0.85     | 0.7      | 0.14      | 0.23   | JUQV                    |

**Table S5. Fixed covariate averages for 5570 municipalities of Brazil from 2000-2016.**

| Year                       | 2000   | 2001   | 2002   | 2003   | 2004   | 2005   | 2006   | 2007   | 2008   | 2009   | 2010   | 2011   | 2012   | 2013   | 2014   | 2015   | 2016   |
|----------------------------|--------|--------|--------|--------|--------|--------|--------|--------|--------|--------|--------|--------|--------|--------|--------|--------|--------|
| <b>Rural workers</b>       | 5688.8 | 5637.4 | 5586.0 | 5534.7 | 5483.3 | 5432.0 | 5380.6 | 5329.3 | 5277.9 | 5226.6 | 5175.2 | 5175.2 | 5175.2 | 5175.2 | 5175.2 | 5175.2 | 5175.2 |
| <b>min</b>                 | 62     | 62     | 61     | 61     | 61     | 61     | 61     | 61     | 60     | 60     | 60     | 60     | 60     | 60     | 60     | 60     | 60     |
| <b>max</b>                 | 66055  | 65730  | 65405  | 65080  | 64755  | 64430  | 65928  | 68128  | 70327  | 72526  | 74725  | 74725  | 74725  | 74725  | 74725  | 74725  | 74725  |
| <b>Sugarcane (%)</b>       | 1.97   | 2.01   | 2.06   | 2.11   | 2.19   | 2.22   | 2.41   | 2.61   | 2.96   | 3.06   | 3.13   | 3.21   | 3.19   | 3.19   | 3.19   | 3.19   | 3.19   |
| <b>min</b>                 | 0      | 0      | 0      | 0      | 0      | 0      | 0      | 0      | 0      | 0      | 0      | 0      | 0      | 0      | 0      | 0      | 0      |
| <b>max</b>                 | 64     | 63.09  | 61.66  | 60.25  | 60.48  | 60.69  | 60.96  | 61.32  | 61.88  | 62.05  | 62.34  | 56.18  | 56.1   | 56.1   | 56.1   | 56.1   | 56.1   |
| <b>Pasture (%)</b>         | 23.15  | 23.13  | 23.12  | 23.11  | 23.1   | 23.08  | 23.07  | 23.05  | 23.04  | 23.03  | 23.03  | 22.64  | 22.26  | 22.26  | 22.26  | 22.26  | 22.26  |
| <b>min</b>                 | 0      | 0      | 0      | 0      | 0      | 0      | 0      | 0      | 0      | 0      | 0      | 0      | 0      | 0      | 0      | 0      | 0      |
| <b>max</b>                 | 86.9   | 85.76  | 86.54  | 87.7   | 88.86  | 90.03  | 91.33  | 92.5   | 93.69  | 95.94  | 101    | 91.91  | 83.93  | 83.93  | 83.93  | 83.93  | 83.93  |
| <b>Forest (%)</b>          | 38.61  | 35.6   | 37.1   | 36.12  | 39.23  | 36.09  | 36.87  | 38.54  | 37.38  | 37.74  | 39.07  | 37.83  | 35.34  | 38.06  | 38.9   | 38.61  | 35.21  |
| <b>min</b>                 | 0      | 0      | 0      | 0      | 0      | 0      | 0      | 0      | 0      | 0      | 0      | 0      | 0      | 0      | 0      | 0      | 0      |
| <b>max</b>                 | 99.55  | 99.31  | 99.32  | 99.41  | 99.41  | 99.56  | 99.56  | 99.54  | 99.55  | 99.2   | 99.16  | 99.53  | 99.53  | 99.48  | 99.36  | 99.47  | 99.01  |
| <b>Forestry (%)</b>        | 0.16   | 0.16   | 0.16   | 0.16   | 0.16   | 0.36   | 0.36   | 0.36   | 0.36   | 0.36   | 0.78   | 0.78   | 0.78   | 0.78   | 1.21   | 1.21   | 1.21   |
| <b>min</b>                 | 0      | 0      | 0      | 0      | 0      | 0      | 0      | 0      | 0      | 0      | 0      | 0      | 0      | 0      | 0      | 0      | 0      |
| <b>max</b>                 | 23.17  | 23.17  | 23.17  | 23.18  | 23.18  | 35.38  | 35.37  | 35.36  | 35.4   | 35.38  | 45.29  | 45.34  | 45.26  | 45.18  | 51.79  | 51.78  | 51.75  |
| <b>Maize</b>               | 3.59   | 3.69   | 3.45   | 3.67   | 3.49   | 3.25   | 3.44   | 3.47   | 3.6    | 3.43   | 2.94   | 3.1    | 3.14   | 3.14   | 3.14   | 3.14   | 3.14   |
| <b>min</b>                 | 0      | 0      | 0      | 0      | 0      | 0      | 0      | 0      | 0      | 0      | 0      | 0      | 0      | 0      | 0      | 0      | 0      |
| <b>max</b>                 | 55.66  | 57.83  | 56.7   | 61.71  | 60.76  | 47.44  | 53.23  | 58.26  | 62.86  | 62.12  | 54.89  | 62.87  | 65.96  | 65.96  | 65.96  | 65.96  | 65.96  |
| <b>Temperature (10*°C)</b> | 296.1  | 296.65 | 296.91 | 296.56 | 296.28 | 296.69 | 296.59 | 296.64 | 296.29 | 296.47 | 296.62 | 296.22 | 296.84 | 296.41 | 296.69 | 297.1  | 296.77 |
| <b>min</b>                 | 287.68 | 288.78 | 288.65 | 288.18 | 287.77 | 288.41 | 288.39 | 288.17 | 287.8  | 288.04 | 288.03 | 287.79 | 288.76 | 287.7  | 288.82 | 288.81 | 287.87 |
| <b>max</b>                 | 306.5  | 306.89 | 306.89 | 306.8  | 306.82 | 306.82 | 306.41 | 306.63 | 306.27 | 307.11 | 306.36 | 306.38 | 306.61 | 306.69 | 305.98 | 306.35 | 306.44 |
| <b>Rainfall (mm/month)</b> | 96.37  | 94.14  | 90.97  | 87.93  | 98.01  | 87.44  | 93.43  | 88.15  | 96.11  | 119.23 | 92.19  | 103.95 | 80.08  | 100.98 | 101.21 | 96.9   | 117.05 |
| <b>min</b>                 | 12     | 8      | 10     | 11     | 10     | 8      | 6      | 8      | 8      | 15     | 10     | 9      | 4      | 9      | 8      | 7      | 8      |
| <b>max</b>                 | 296    | 267    | 326    | 265    | 266    | 280    | 332    | 288    | 314    | 330    | 324    | 283    | 286    | 302    | 304    | 285    | 364    |

**Table S6. Model estimates from the selected predictors of hantavirus disease in humans in Brazil.** Those values are related to Figure 5 in the main text. PA = presence/absence of cases, Cases = number of cases.

| Response variable | Component       | Coefficient        | Model                                | Mean   | 95% Credible interval |
|-------------------|-----------------|--------------------|--------------------------------------|--------|-----------------------|
|                   | -               | Intercept          | Binomial with logit link             | -8.347 | -8.875 to -7.893      |
| PA                | Biodiversity    | Host richness      | Binomial with logit link             | 0.797  | 0.413 to 1.185        |
| PA                | Social          | Population at risk | Binomial with logit link             | 0.777  | 0.668 to 0.886        |
| PA                | Climate         | Rainfall           | Binomial with logit link             | 0.071  | -0.075 to 0.216       |
| PA                | Climate         | Temperature        | Binomial with logit link             | -0.528 | -0.968 to -0.088      |
| PA                | Land use change | Forest             | Binomial with logit link             | 0.29   | 0.064 to 0.514        |
| PA                | Land use change | Pasture            | Binomial with logit link             | -0.08  | -0.31 to 0.147        |
| PA                | Land use change | Sugarcane          | Binomial with logit link             | 0.182  | 0.002 to 0.361        |
| PA                | Land use change | Forestry           | Binomial with logit link             | -0.082 | -0.168 to -0.0006     |
| PA                | Land use change | Maize              | Binomial with logit link             | 0.159  | 0.002 to 0.310        |
| Cases             | -               | Intercept          | Zero-Truncated poisson with log link | -0.988 | -1.726 to -0.304      |
| Cases             | Biodiversity    | Host richness      | Zero-Truncated poisson with log link | 0.005  | -0.410 to 0.426       |
| Cases             | Social          | Population at risk | Zero-Truncated poisson with log link | 0.366  | 0.219 to 0.513        |
| Cases             | Climate         | Rainfall           | Zero-Truncated poisson with log link | 0.111  | -0.007 to 0.229       |
| Cases             | Climate         | Temperature        | Zero-Truncated poisson with log link | -0.208 | -0.716 to 0.299       |
| Cases             | Land use change | Forest             | Zero-Truncated poisson with log link | 0.262  | 0.023 to 0.502        |
| Cases             | Land use change | Pasture            | Zero-Truncated poisson with log link | 0.036  | -0.249 to 0.320       |
| Cases             | Land use change | Sugarcane          | Zero-Truncated poisson with log link | 0.102  | -0.279 to 0.474       |
| Cases             | Land use change | Forestry           | Zero-Truncated poisson with log link | 0.04   | -0.111 to 0.181       |
| Cases             | Land use change | Maize              | Zero-Truncated poisson with log link | 0.015  | -0.19 to 0.217        |

**Table S7. Average hantavirus disease risk in municipalities of Brazil with risk equal to or greater than 5%, in decreasing order, considering a Bernoulli model for the period from 2000-2014 for all 5570 municipalities of Brazil.** Municipality contains the Municipality code followed by municipality name without special characters. Risk was rounded to 3 decimal places. Data for all municipalities per year can be downloaded at [https://github.com/renatamuy/Muylaert\\_et\\_al\\_2019](https://github.com/renatamuy/Muylaert_et_al_2019)

| Municipality                 | Risk  |
|------------------------------|-------|
| 530010 Brasilia              | 0.771 |
| 510263 Campo Novo do Parecis | 0.749 |
| 314810 Patrocinio            | 0.727 |
| 310400 Araxa                 | 0.671 |
| 510795 Tangara da Serra      | 0.643 |
| 410680 Cruz Machado          | 0.616 |
| 355170 Sertaozinho           | 0.602 |
| 316210 Sao Gotardo           | 0.579 |
| 150503 Novo Progresso        | 0.555 |
| 312950 Ibia                  | 0.521 |
| 354340 Ribeirao Preto        | 0.506 |
| 420430 Concordia             | 0.493 |
| 510623 Nova Olimpia          | 0.481 |
| 510350 Diamantino            | 0.479 |
| 317020 Uberlandia            | 0.441 |
| 317010 Uberaba               | 0.439 |
| 412200 Rio Azul              | 0.439 |
| 354020 Pontal                | 0.436 |
| 410850 General Carneiro      | 0.426 |
| 410290 Bituruna              | 0.381 |
| 316510 Sao Tomas de Aquino   | 0.351 |
| 520480 Campo Alegre de Goias | 0.333 |
| 150060 Altamira              | 0.330 |
| 314980 Perdizes              | 0.324 |
| 411390 Mallet                | 0.312 |
| 420770 Ipumirim              | 0.311 |
| 412820 Uniao da Vitoria      | 0.309 |
| 510642 Peixoto de Azevedo    | 0.305 |
| 411020 Inacio Martins        | 0.304 |
| 420160 Arroio Trinta         | 0.293 |
| 354890 Sao Carlos            | 0.293 |
| 520110 Anapolis              | 0.289 |
| 510805 Terra Nova do Norte   | 0.287 |
| 420240 Blumenau              | 0.285 |
| 315550 Rio Paranaiba         | 0.276 |
| 421930 Videira               | 0.265 |
| 311150 Campos Altos          | 0.255 |
| 411070 Irati                 | 0.254 |
| 510726 Santo Afonso          | 0.253 |
| 411440 Mangueirinha          | 0.251 |
| 315050 Pimenta               | 0.250 |
| 510787 Sapezal               | 0.233 |
| 510170 Barra do Bugres       | 0.232 |
| 411930 Pinhao                | 0.229 |
| 420900 Joacaba               | 0.229 |
| 420070 Alfredo Wagner        | 0.227 |
| 410940 Guarapuava            | 0.220 |
| 350320 Araraquara            | 0.218 |
| 412030 Porto Vitoria         | 0.213 |

|                                    |       |
|------------------------------------|-------|
| 522185 Valparaíso de Goiás         | 0.212 |
| 314800 Patos de Minas              | 0.205 |
| 351930 Ibaté                       | 0.203 |
| 420985 Lindoia do Sul              | 0.203 |
| 510558 Marcelândia                 | 0.201 |
| 510730 São José do Rio Claro       | 0.199 |
| 352370 Itirapua                    | 0.199 |
| 411760 Palmas                      | 0.197 |
| 410645 Coronel Domingos Soares     | 0.196 |
| 421590 São Bonifácio               | 0.195 |
| 316810 Tapira                      | 0.193 |
| 521190 Jataí                       | 0.193 |
| 420850 Ituporanga                  | 0.193 |
| 421260 Perituba                    | 0.191 |
| 420127 Arabutã                     | 0.190 |
| 150680 Santarém                    | 0.189 |
| 350560 Barrinha                    | 0.189 |
| 420300 Cacador                     | 0.188 |
| 421003 Luzerna                     | 0.188 |
| 420980 Leoberto Leal               | 0.179 |
| 421780 Taio                        | 0.178 |
| 316220 São João Batista do Glória  | 0.177 |
| 314790 Passos                      | 0.174 |
| 420860 Jaborá                      | 0.170 |
| 421935 Vitor Meireles              | 0.169 |
| 353430 Orlandia                    | 0.168 |
| 510190 Brasnorte                   | 0.168 |
| 410400 Campina Grande do Sul       | 0.168 |
| 412060 Prudentópolis               | 0.167 |
| 311510 Cassia                      | 0.167 |
| 421750 Seara                       | 0.165 |
| 412560 São Mateus do Sul           | 0.163 |
| 510320 Colider                     | 0.162 |
| 520620 Cristalina                  | 0.162 |
| 421875 Tunápolis                   | 0.159 |
| 431680 Santa Cruz do Sul           | 0.159 |
| 421450 Rio do Campo                | 0.158 |
| 421570 Santo Amaro da Imperatriz   | 0.158 |
| 353060 Mogi das Cruzes             | 0.158 |
| 521250 Luziania                    | 0.157 |
| 355030 São Paulo                   | 0.156 |
| 351090 Cassia dos Coqueiros        | 0.154 |
| 420765 Ipora do Oeste              | 0.152 |
| 421360 Porto União                 | 0.152 |
| 351460 Dumont                      | 0.150 |
| 421370 Pouso Redondo               | 0.149 |
| 420680 Ibicaré                     | 0.145 |
| 420810 Itaipópolis                 | 0.145 |
| 421670 São José do Cedro           | 0.145 |
| 420757 Iomere                      | 0.142 |
| 521975 Santo Antônio do Descoberto | 0.141 |
| 316680 Serra do Salitre            | 0.141 |
| 421920 Vidal Ramos                 | 0.140 |
| 510340 Cuiabá                      | 0.139 |
| 510600 Nortelândia                 | 0.136 |
| 510560 Matupá                      | 0.135 |



|                                 |       |
|---------------------------------|-------|
| 420090 Angelina                 | 0.134 |
| 510345 Denise                   | 0.133 |
| 316470 Sao Sebastiao do Paraíso | 0.133 |
| 421470 Rio dos Cedros           | 0.130 |
| 313750 Lagoa Formosa            | 0.130 |
| 421020 Major Gercino            | 0.128 |
| 420670 Herval d'Oeste           | 0.127 |
| 430510 Caxias do Sul            | 0.126 |
| 421220 Papanduva                | 0.126 |
| 315150 Piumhi                   | 0.125 |
| 315770 Santa Juliana            | 0.125 |
| 312890 Guimaraná                | 0.125 |
| 421430 Rancho Queimado          | 0.125 |
| 420010 Abelardo Luz             | 0.124 |
| 351310 Cravinhos                | 0.124 |
| 520549 Cidade Ocidental         | 0.124 |
| 421960 Xavantina                | 0.122 |
| 420420 Chapeco                  | 0.122 |
| 315690 Sacramento               | 0.119 |
| 421500 Rio Negrinho             | 0.119 |
| 510626 Novo Mundo               | 0.119 |
| 310740 Bom Despacho             | 0.119 |
| 421340 Ponte Serrada            | 0.117 |
| 510619 Nova Santa Helena        | 0.116 |
| 420190 Aurora                   | 0.115 |
| 510885 Nova Marilândia          | 0.115 |
| 310070 Água Comprida            | 0.115 |
| 510410 Guaranta do Norte        | 0.114 |
| 520840 Goianópolis              | 0.114 |
| 311930 Coromandel               | 0.111 |
| 313160 Irai de Minas            | 0.111 |
| 350590 Batatais                 | 0.111 |
| 314650 Pains                    | 0.109 |
| 353010 Mirandópolis             | 0.109 |
| 421085 Mirim Doce               | 0.108 |
| 520870 Goiania                  | 0.107 |
| 421567 Santa Terezinha          | 0.107 |
| 420260 Bom Retiro               | 0.105 |
| 354760 Santa Rosa de Viterbo    | 0.104 |
| 351860 Guariba                  | 0.104 |
| 421410 Presidente Nereu         | 0.103 |
| 431238 Monte Belo do Sul        | 0.103 |
| 420640 Guaraciaba               | 0.102 |
| 420775 Iraceminha               | 0.102 |
| 314320 Monte Santo de Minas     | 0.102 |
| 520510 Catalao                  | 0.101 |
| 430440 Canela                   | 0.101 |
| 420780 Irani                    | 0.100 |
| 310510 Bambuí                   | 0.100 |
| 150730 Sao Felix do Xingu       | 0.100 |
| 421480 Rio do Sul               | 0.099 |
| 421420 Quilombo                 | 0.099 |
| 412080 Quatro Barras            | 0.097 |
| 314700 Paracatu                 | 0.097 |
| 420740 Imbuia                   | 0.097 |
| 421540 Salto Veloso             | 0.097 |

|                                   |       |
|-----------------------------------|-------|
| 421390 Presidente Castello Branco | 0.096 |
| 421530 Saleté                     | 0.095 |
| 510130 Arenópolis                 | 0.095 |
| 310420 Arcos                      | 0.093 |
| 421850 Três Tílias                | 0.093 |
| 315300 Pratinha                   | 0.091 |
| 412175 Reserva do Iguaçu          | 0.091 |
| 412150 Rebouças                   | 0.091 |
| 420380 Canoinhas                  | 0.091 |
| 430480 Carlos Barbosa             | 0.091 |
| 421490 Rio Fortuna                | 0.089 |
| 411870 Paulo Frontin              | 0.089 |
| 421180 Ouro                       | 0.087 |
| 410570 Clevelandia                | 0.087 |
| 421005 Macieira                   | 0.087 |
| 355150 Serrana                    | 0.086 |
| 420490 Descanso                   | 0.086 |
| 312120 Delfinópolis               | 0.085 |
| 410445 Cantagalo                  | 0.085 |
| 431805 São Domingos do Sul        | 0.084 |
| 312070 Cruzeiro da Fortaleza      | 0.084 |
| 421440 Rio das Antas              | 0.084 |
| 352740 Lucélia                    | 0.083 |
| 431440 Pelotas                    | 0.083 |
| 311240 Capetinga                  | 0.082 |
| 510890 Nova Maringá               | 0.082 |
| 353630 Patrocínio Paulista        | 0.081 |
| 420760 Ipirá                      | 0.081 |
| 521230 Leopoldo de Bulhões        | 0.080 |
| 421050 Maravilha                  | 0.079 |
| 510622 Nova Mutum                 | 0.079 |
| 411820 Paranaguá                  | 0.079 |
| 420400 Catanduvas                 | 0.079 |
| 421940 Witmarsum                  | 0.079 |
| 522045 Senador Canedo             | 0.078 |
| 420630 Guabiruba                  | 0.078 |
| 520030 Alexânia                   | 0.078 |
| 420768 Ipuçu                      | 0.078 |
| 421190 Palhoca                    | 0.078 |
| 421725 São Pedro de Alcântara     | 0.078 |
| 312970 Ibiraci                    | 0.078 |
| 352930 Mato                       | 0.078 |
| 420120 Antônio Carlos             | 0.078 |
| 421890 Urubici                    | 0.077 |
| 420970 Lebon Régis                | 0.077 |
| 522119 Teresópolis de Goiás       | 0.076 |
| 411860 Paula Freitas              | 0.076 |
| 431290 Nova Bassano               | 0.076 |
| 110030 Vilhena                    | 0.075 |
| 420920 Lacerdópolis               | 0.075 |
| 420510 Dona Emma                  | 0.074 |
| 520580 Corumbá de Goiás           | 0.074 |
| 521010 Ipameri                    | 0.074 |
| 420315 Calmon                     | 0.074 |
| 421210 Palmitos                   | 0.073 |
| 351440 Dracena                    | 0.073 |

|                                |       |
|--------------------------------|-------|
| 421150 Nova Trento             | 0.073 |
| 313030 Iguatama                | 0.073 |
| 421460 Rio do Oeste            | 0.072 |
| 420270 Botuvera                | 0.072 |
| 311980 Corrego Danta           | 0.071 |
| 420540 Florianopolis           | 0.071 |
| 510268 Campos de Julio         | 0.071 |
| 420040 Agua Doce               | 0.071 |
| 421580 Sao Bento do Sul        | 0.071 |
| 420610 Grao Para               | 0.070 |
| 412700 Teixeira Soares         | 0.070 |
| 520815 Gameleira de Goias      | 0.070 |
| 510336 Conquista D'Oeste       | 0.070 |
| 352510 Jardinopolis            | 0.070 |
| 353050 Mococa                  | 0.069 |
| 410950 Guaraquecaba            | 0.069 |
| 421507 Riqueza                 | 0.069 |
| 420915 Jose Boiteux            | 0.068 |
| 412510 Sao Joao do Triunfo     | 0.068 |
| 420675 Ibiam                   | 0.068 |
| 311995 Corrego Fundo           | 0.068 |
| 353360 Nuporanga               | 0.068 |
| 510525 Lucas do Rio Verde      | 0.068 |
| 430320 Cacique Doble           | 0.068 |
| 410965 Honorio Serpa           | 0.067 |
| 421400 Presidente Getulio      | 0.066 |
| 420330 Campo Alegre            | 0.066 |
| 510675 Pontes e Lacerda        | 0.065 |
| 350940 Cajuru                  | 0.065 |
| 312125 Delta                   | 0.065 |
| 420180 Atalanta                | 0.064 |
| 510830 Uniao do Sul            | 0.064 |
| 431030 Ilopolis                | 0.064 |
| 310190 Alpinopolis             | 0.064 |
| 421660 Sao Jose                | 0.063 |
| 412550 Sao Jose dos Pinhais    | 0.063 |
| 420435 Cordilheira Alta        | 0.063 |
| 421680 Sao Jose do Cerrito     | 0.063 |
| 430210 Bento Goncalves         | 0.063 |
| 420890 Jaragua do Sul          | 0.063 |
| 431730 Santa Vitoria do Palmar | 0.062 |
| 351480 Eldorado                | 0.062 |
| 432260 Venancio Aires          | 0.062 |
| 352760 Luis Antonio            | 0.061 |
| 354650 Santa Ernestina         | 0.061 |
| 351620 Franca                  | 0.061 |
| 352890 Mariapolis              | 0.061 |
| 353640 Pauliceia               | 0.061 |
| 520551 Cocalzinho de Goias     | 0.061 |
| 311430 Carmo do Paranaiba      | 0.060 |
| 420060 aguas Mornas            | 0.060 |
| 510050 Alto Paraguai           | 0.060 |
| 421630 Sao Joao Batista        | 0.060 |
| 412760 Tijucas do Sul          | 0.060 |
| 420550 Fraiburgo               | 0.060 |
| 420590 Gaspar                  | 0.059 |

|                              |       |
|------------------------------|-------|
| 431880 Sao Lourenco do Sul   | 0.059 |
| 430450 Canguçu               | 0.059 |
| 520355 Bonfinópolis          | 0.059 |
| 313880 Luz                   | 0.059 |
| 420030 Agronômica            | 0.059 |
| 431410 Passo Fundo           | 0.059 |
| 352970 Miguelópolis          | 0.059 |
| 421060 Massaranduba          | 0.059 |
| 410480 Cascavel              | 0.059 |
| 350925 Cajati                | 0.059 |
| 310410 Arceburgo             | 0.058 |
| 316294 Sao Jose da Barra     | 0.058 |
| 312860 Guarda-Mor            | 0.058 |
| 420910 Joinville             | 0.057 |
| 352430 Jaboticabal           | 0.057 |
| 510792 Sorriso               | 0.057 |
| 353310 Nova Guataporanga     | 0.057 |
| 520025 Aguas Lindas de Goias | 0.057 |
| 421970 Xaxim                 | 0.056 |
| 352600 Junqueiropolis        | 0.056 |
| 522060 Silvania              | 0.056 |
| 430790 Farroupilha           | 0.056 |
| 510370 Feliz Natal           | 0.056 |
| 420450 Corupa                | 0.055 |
| 432290 Viadutos              | 0.055 |
| 430165 Barao                 | 0.055 |
| 353490 Pacaembu              | 0.055 |
| 431442 Picada Cafe           | 0.055 |
| 430910 Gramado               | 0.055 |
| 420243 Bocaina do Sul        | 0.055 |
| 420080 Anchieta              | 0.055 |
| 410130 Antonio Olinto        | 0.055 |
| 521730 Pirenópolis           | 0.054 |
| 314310 Monte Carmelo         | 0.054 |
| 315640 Romaria               | 0.054 |
| 353160 Monte Castelo         | 0.054 |
| 420470 Cunha Pora            | 0.054 |
| 420360 Campos Novos          | 0.053 |
| 354290 Ribeirao Bonito       | 0.053 |
| 350100 Altinópolis           | 0.053 |
| 421170 Orleans               | 0.053 |
| 355090 Sao Simao             | 0.053 |
| 510590 Nobres                | 0.052 |
| 410960 Guaratuba             | 0.052 |
| 353950 Pitangueiras          | 0.052 |
| 421030 Major Vieira          | 0.052 |
| 430700 Erechim               | 0.051 |
| 354490 Sales Oliveira        | 0.051 |
| 510515 Juina                 | 0.051 |
| 354090 Pradópolis            | 0.050 |
| 510455 Itauba                | 0.050 |
| 420110 Anitapolis            | 0.050 |
| 130290 Maues                 | 0.050 |
| 431971 Sao Valentim do Sul   | 0.050 |
